# Supplementary material
Source: Springer Nature journal article supplement (https://www.springermedizin.de/resource/supplementary/13023_2009_172_MOESM1_ESM.pdf/9641870)

% with ARR > 26 ng/mU

Men

Women

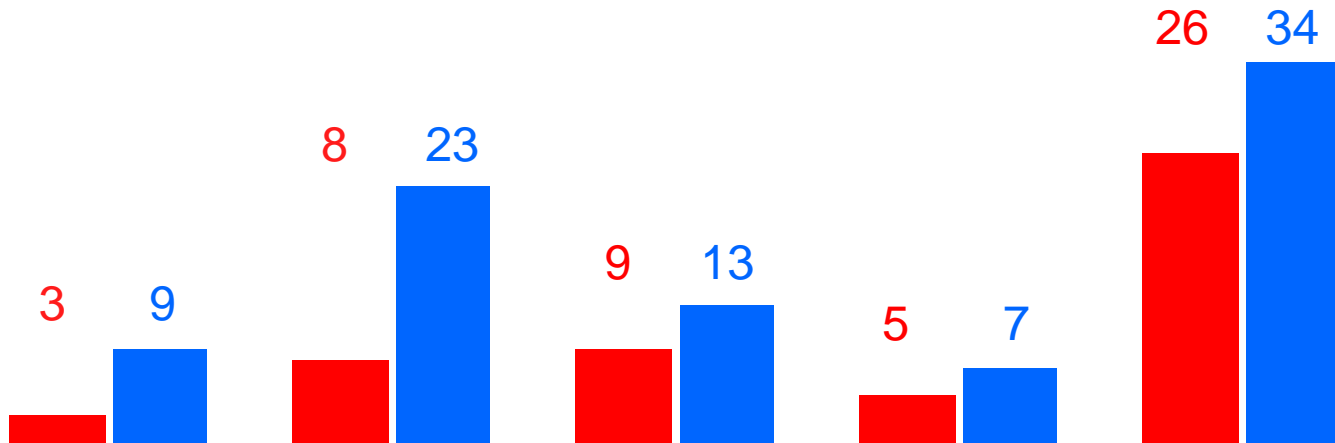

No HTN  
n=1960

HTN no Tx  
n=444

HTN diu  
n=281

HTN ACEI  
n=279

HTN BB  
n=204

Supplement: MOESM1 [file 9641870]
